# Supplementary material
Source: PubMed Central journal article supplement (PMC5610497)
Supplement: AAC.00551-17_zac010176537s1.pdf [file AAC.00551-17_zac010176537s1.pdf]

**Figure S1.** The different growth conditions for *E. coli* w3110  $\Delta$ *pabB*. (A) Growth curves of *E. coli* w3110  $\Delta$ *pabB* in E minimum medium supplemented with different concentrations of *pABA*. (B) Growth curves of *E. coli* W3110 and *E. coli* W3110  $\Delta$ *pabB* in the presence or absence of *pABA* in 7H9 medium supplemented with 10% OADC. Growth of the bacteria at 37 °C was measured by taking OD<sub>600</sub> every 12 hours using the SynergyH1 Hybrid reader (BioTek, USA). Data represent mean  $\pm$  SD from three biological replicates.

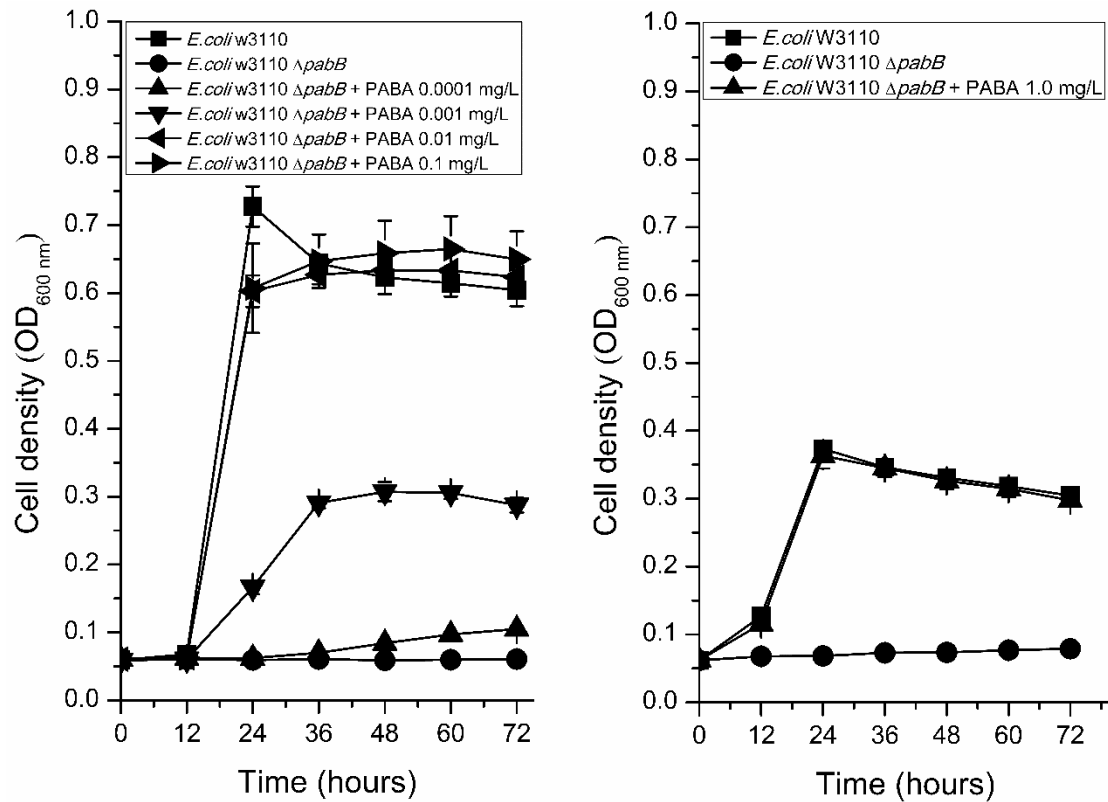

**Figure S2.** Growth of H37Ra and H37Ra  $\Delta pabC$  on 7H10 solid medium in the presence of different concentrations of *pABA*. About  $10^5$  cfus of bacteria was dropped onto the solid medium and cultured for 14~21 days at 37 °C. Experiments were replicated three times, and representative results are shown.

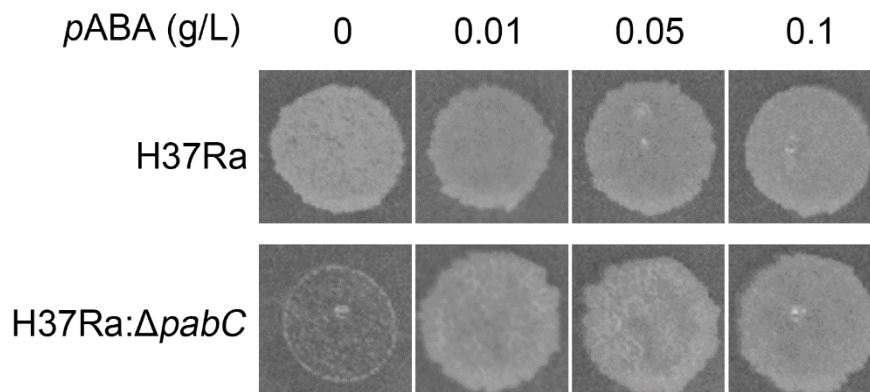

**Figure S3.** Comparison of the expressional level of ThyX during the exponential phase in H37Ra, H37Ra  $\Delta sigB$ , and H37Ra  $\Delta sigB$  pMV261::*sigB* by Western blot assay. Lane 1, anti- ThyX immunoblotted to the total protein of H37Ra  $\Delta sigB$ . Lane 2, anti-ThyX immunoblotted to the total protein of H37Ra  $\Delta sigB$ . Lane 3, anti- ThyX immunoblotted to the total protein of H37Ra  $\Delta sigB$  pMV261::*sigB*. Experiments were replicated three times, and representative results are shown.

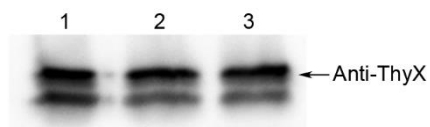

**Table S3** Plasmids, strains and primers used in this study

| Category | Name                                            | Relevant Features/Sequences                                                   | Source        |
|----------|-------------------------------------------------|-------------------------------------------------------------------------------|---------------|
| Plasmids |                                                 |                                                                               |               |
|          | pMV261                                          | expression plasmid in <i>M.tb</i> , Km <sup>R</sup>                           | Lab Stock     |
|          | pET21a:: <i>pabB</i>                            | <i>pabB</i> expression plasmid, Ap <sup>R</sup>                               | This Study    |
|          | pMV261:: <i>sigB</i>                            | <i>sigB</i> expression plasmid in <i>M.tb</i> , Km <sup>R</sup>               | This Study    |
| Strains  |                                                 |                                                                               |               |
|          | H37Ra                                           | <i>M. tb</i> H37Ra                                                            | Lab Stock     |
|          | mc <sup>2</sup> 155                             | <i>M. smegmatis</i> mc <sup>2</sup> 155                                       | Lab Stock     |
|          | H37Ra $\Delta$ <i>sigB</i>                      | Specialized transduction of strain H37Ra with phAES <i>sigB</i> <sub>Ra</sub> | This Study    |
|          | H37Ra $\Delta$ <i>sigB</i> pMV261:: <i>sigB</i> | H37Ra $\Delta$ <i>sigB</i> transformed with pMV261:: <i>sigB</i>              | This Study    |
|          | <i>E. coli</i> W3110 $\Delta$ <i>pabB</i>       | <i>pabB</i> gene deleted in <i>E. coli</i> W3110                              | Lab Construct |
|          | H37Ra $\Delta$ <i>pabC</i>                      | Specialized transduction of strain H37Ra with phAES <i>PabC</i> <sub>Ra</sub> | This Study    |
|          | <i>E.coli</i> BL21 pET21a:: <i>pabB</i>         | <i>E.coli</i> BL21 transformed with pET21a:: <i>pabB</i>                      | This Study    |
| Primers  |                                                 |                                                                               |               |
|          | <i>sigB</i> koLFP                               | <u>TTTTTTTTCCATAAATTGGGCGTCTGGTAC</u><br><u>GTTCAATCGTCTGG</u>                | This Study    |
|          | <i>sigB</i> koLRP                               | <u>TTTTTTTTCCATTTCTTGGGTGGTGGCCC</u><br><u>TTGTGGGTGCATCGG</u>                | This Study    |
|          | <i>sigB</i> koRFP                               | <u>TTTTTTTTCCATAGATTGGGCGGGCGGAT</u><br><u>CGGCTGCGGTCTGTAC</u>               | This Study    |
|          | <i>sigB</i> koRRP                               | <u>TTTTTTTTCCATCTTTGGGGTGC GGTT</u><br><u>AGCTCAGACTTTCTCG</u>                | This Study    |
|          | <i>sigB</i> LYZ                                 | GGGTAACGGGAAACACCTCGCCAC                                                      | This Study    |
|          | <i>sigB</i> RYZ                                 | CGGCTACCAACGGGCTGAACAAC                                                       | This Study    |
|          | <i>pabC</i> koLFP                               | <u>TTTTTTTTCCATAAATTGGCACCGTTCCC</u><br><u>AGTCGTCCCAC</u>                    | This Study    |
|          | <i>pabC</i> koLRP                               | <u>TTTTTTTTCCATTTCTTGG</u><br><u>CACCGTCAAGCGTGACCACC</u>                     | This Study    |
|          | <i>pabC</i> koRFP                               | <u>TTTTTTTTCCATAGATTGGCGCTATTGTCA</u><br><u>GCGACCGGTG</u>                    | This Study    |
|          | <i>pabC</i> koRRP                               | <u>TTTTTTTTCCATCTTTGG</u><br><u>CGCCGCGCCCGGATCCTGGAC</u>                     | This Study    |
|          | <i>pabC</i> LYZ                                 | AGACCCCGTTTGAGCAGGGCCAGTG                                                     | This Study    |
|          | <i>pabC</i> RYZ                                 | GTGCTCTGGACCCAAGCAAGGACTGAC                                                   | This Study    |
|          | <i>MpabB</i> -L                                 | GGAATTCCAT <u>ATGAACTTAGCGTGGGAG</u><br><u>CTTAGC</u>                         | This Study    |
|          | <i>MpabB</i> -R                                 | ATAAGAATGCGGCCGCCGCACTTTGCT<br><u>GGCTAACCG</u>                               | This Study    |
|          | <i>sigB</i> -L                                  | CATGCCATGGTA <u>ATGGCCGATGCACCCA</u><br><u>CAAGG</u>                          | This Study    |
|          | <i>sigB</i> -R                                  | ATAAGAATGCGGCCGCGCTGGCGTACGA                                                  | This Study    |

---

|                  |                           |            |
|------------------|---------------------------|------------|
|                  | <u>CCGCAGCCG</u>          |            |
| <i>pabB</i> -p-F | CGCTGAAGTCCCCGTACCCGGAGAA | This Study |
| <i>pabB</i> -p-R | CGGCGACCGATCCCTCGACCGGG   | This Study |

---
